# Supplementary material for: Autocatalytic oncotherapy nanosystem with glucose depletion for the cascade amplification of hypoxia-activated chemotherapy and H2O2-dependent chemodynamic therapy
Source: Royal Society of Chemistry journal article supplement (doi:10.1039/d1bm01944a), 2022-01-01
Supplement: d1bm01944a1.pdf [file d1bm01944a1.pdf]

## Supporting Information

### Autocatalytic oncotherapy nanosystem with glucose depletion for cascade amplification of hypoxia-activated chemotherapy and H<sub>2</sub>O<sub>2</sub>-dependent chemodynamic therapy

Yao Hu <sup>a</sup>, Song Bai <sup>a</sup>, Xingyu Fan <sup>a</sup>, Fangfang Zhou <sup>b</sup>, Botao Chen <sup>c</sup>, Songwen Tan <sup>d</sup>, Hui Xu <sup>e</sup>, Anqiang Pan <sup>a</sup>, Shuquan Liang <sup>a</sup>, Yongju He <sup>a,\*</sup>

<sup>a</sup> School of Material Science and Engineering, Central South University, Changsha, Hunan 410083, China

<sup>b</sup> Department of Neurology, the Second Xiangya Hospital of Central South University, Changsha, Hunan 410011, China

<sup>c</sup> Hunan Provincial People's Hospital, the First-Affiliated Hospital of Hunan Normal University, Changsha Hunan 410005, China

<sup>d</sup> Xiangya School of Pharmaceutical Sciences, Central South University, Changsha, Hunan 410013, China

<sup>e</sup> Institute of Super-Microstructure and Ultrafast Process in Advanced Materials, School of Physics and Electronics, Central South University, Changsha, Hunan 410083, China

Corresponding author: [heyongju@csu.edu.cn](mailto:heyongju@csu.edu.cn)

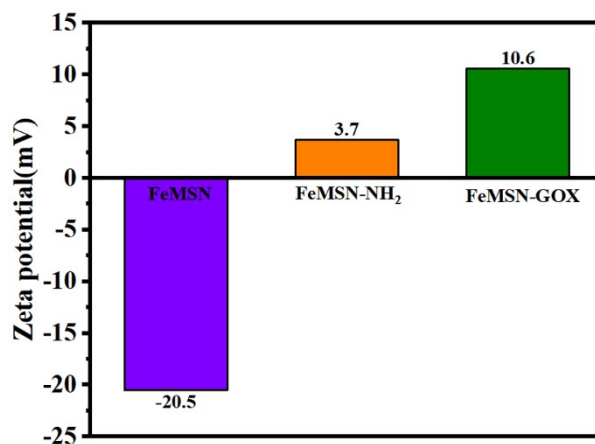

**Figure S1.** Surface zeta potential of FeMSN, FeMSN-NH<sub>2</sub> and FeMSN-GOX.

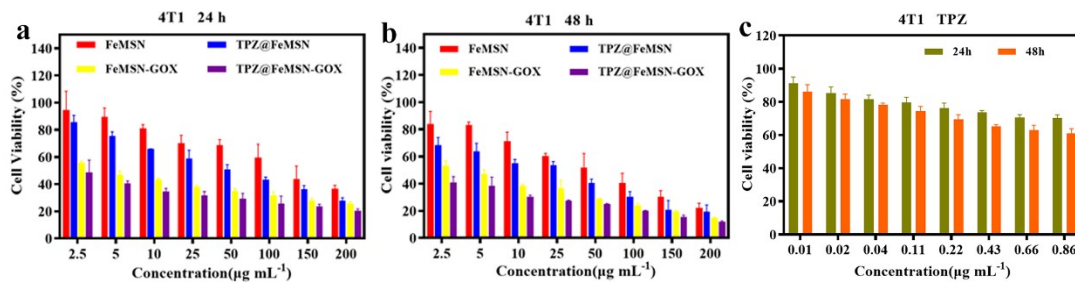

**Figure S2.** The cell viability of 4T1 cells after (a) 24 and (b) 48 h incubation with different nanoplateforms. (c) The cell viability of 4T1 cells after treatment with free TPZ at various concentrations for 24 and 48 h.

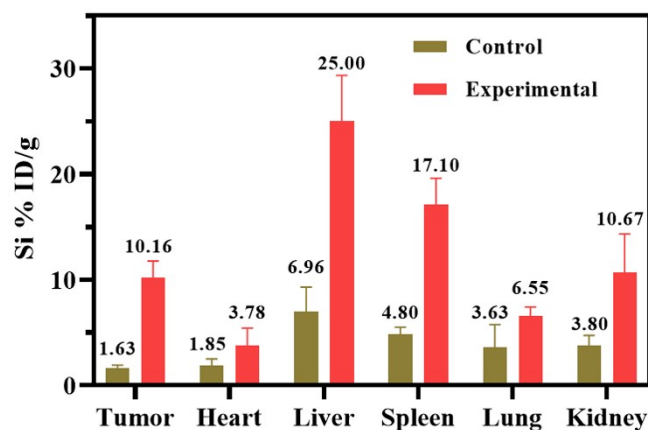

**Figure S3.** The in-vivo distribution of Si element after 24 h-post intravenous injection of TPZ@FeMSN-GOX into 4T1 tumor-bearing mice.

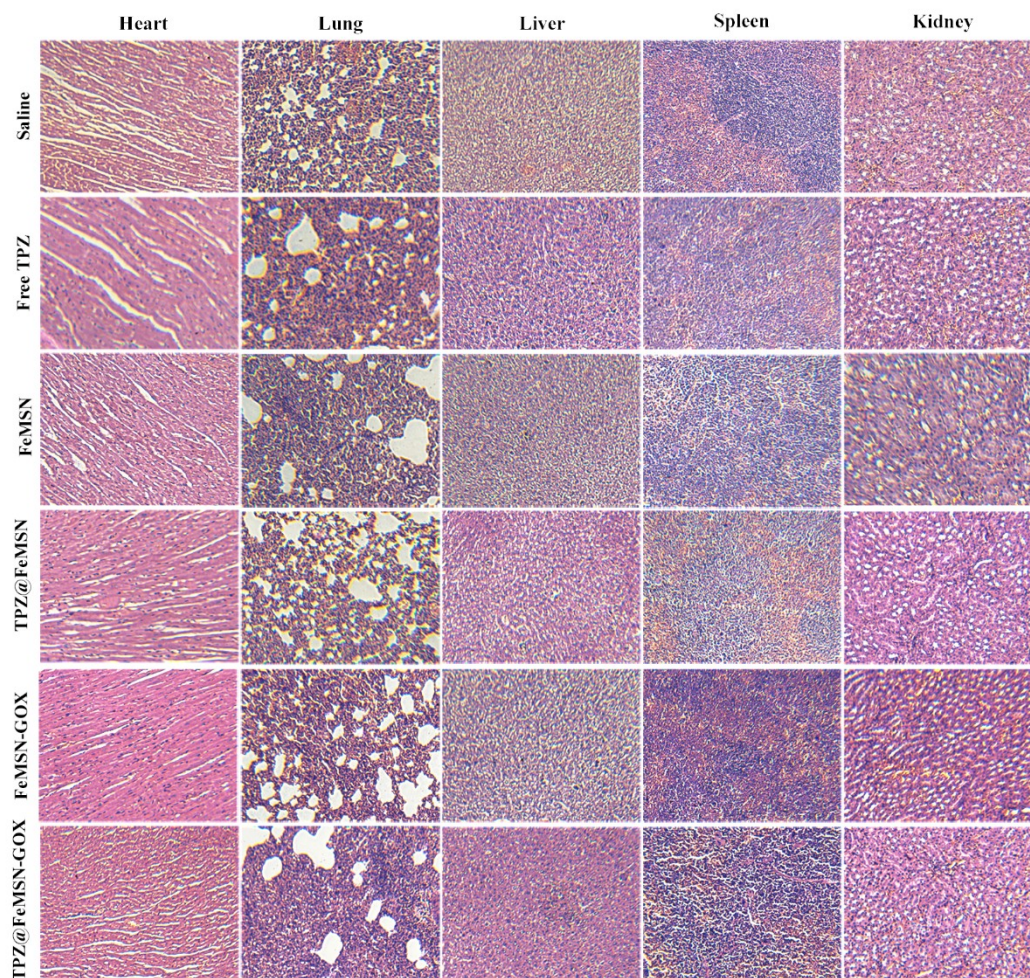

**Figure S4.** Histological analysis of the major organs after different treatments.
